# Supplementary material for: Challenging Occam’s Razor: Dual Molecular Diagnoses Explain Entangled Clinical Pictures
Source: MDPI journal article supplement (doi:10.3390/genes13112023), 2022-11-03
Supplement: s1 [file s1]

| Samples     | Target Region Average Coverage | Target Region Minimum Coverage | Target Region Maximum Coverage | Number of Poorly Covered Regions | Number of Poorly Covered Exons |
|-------------|--------------------------------|--------------------------------|--------------------------------|----------------------------------|--------------------------------|
| All samples | 70                             | 18                             | 4784                           | 118858                           | 27746                          |
| Patient 1   | 69                             | 37                             | 4604                           | 120424                           | 15806                          |
| Patient 2   | 76                             | 34                             | 5097                           | 118485                           | 48557                          |
| Patient 3   | 70                             | 1                              | 5196                           | 119817                           | 15677                          |
| Patient 4   | 79                             | 32                             | 5545                           | 117523                           | 48851                          |
| Patient 5   | 76                             | 5                              | 5754                           | 118301                           | 48068                          |
| Patient 6   | 70                             | 7                              | 5794                           | 118664                           | 49305                          |
| Patient 7   | 71                             | 33                             | 4529                           | 120018                           | 16990                          |

**Table S1. Coverage statistics.** Average coverage statistics of all 342 sequence samples and detailed coverage statistics of Patients 1 to 7 are reported. Minimum coverage is reported considering bases with coverage depth >15. A coverage <15 is considered to define the number of poorly covered regions and poorly covered exons (target regions).
