# Supplementary material for: Challenging Occam’s Razor: Dual Molecular Diagnoses Explain Entangled Clinical Pictures
Source: MDPI journal article supplement (doi:10.3390/genes13112023), 2022-11-03
Supplement: s1 [file s1]

| Samples   | Total number of variants | On-target variants | Off-target variants | Variants reported in dbSNP | Variants with MAF<0.1% | Coding and splicing variants | Pathogenic, likely pathogenic and VUS | Pathogenic and likely pathogenic in ClinVar | Familial pattern of inheritance |
|-----------|--------------------------|--------------------|---------------------|----------------------------|------------------------|------------------------------|---------------------------------------|---------------------------------------------|---------------------------------|
| Patient 1 | 130949                   | 27583              | 20565               | 24220                      | 3195                   | 722                          | 652                                   | 2                                           | 9                               |
| Patient 2 | 126897                   | 26438              | 19689               | 23582                      | 2290                   | 521                          | 466                                   | 2                                           | 8                               |
| Patient 3 | 122810                   | 27033              | 20016               | 24117                      | 2156                   | 521                          | 471                                   | 4                                           | 6                               |
| Patient 4 | 128512                   | 27097              | 20053               | 24094                      | 2110                   | 492                          | 450                                   | 4                                           | 6                               |
| Patient 5 | 128719                   | 26708              | 19899               | 23806                      | 2246                   | 493                          | 442                                   | 5                                           | 5                               |
| Patient 6 | 128748                   | 27441              | 20609               | 23962                      | 3231                   | 743                          | 660                                   | 5                                           | 19                              |
| Patient 7 | 125625                   | 26755              | 19893               | 23678                      | 2033                   | 513                          | 448                                   | 1                                           | 16                              |

**Table S2. Variant calling and filtering.** For each sample, the total number of called variants are reported, divided in on-target and off-target calls. On-target variants were checked in NCBI dbSNP build 155 to verify whether they have been previously reported. Variants were therefore analysed through the enGenome Expert Variant Interpreter (eVai) software, according to the following criteria: MAF (Minor Allele Frequency) <0.1%, effect (only coding and splicing variants were considered), and pathogenicity (evaluated with the ACMG/AMP guidelines and through *in silico* prediction tools – only pathogenic, likely pathogenic and Variants of Uncertain Significance (VUS) were considered). The retained variants were both checked in ClinVar, to verify whether they had already been reported as pathogenic or likely pathogenic, and analysed according to each patient's relevant familial pattern of inheritance (autosomal dominant, autosomal recessive, X-linked dominant, X-linked recessive, Y-linked, and *de novo*). Variants were then discussed within a multidisciplinary team and only variants of interest were confirmed by Sanger sequencing.
